# Supplementary material
Source: publisher figshare collection journal article supplement (https://acs.figshare.com/ndownloader/files/18662564)
Supplement: Supplementary file 1 [file 18662564]

## Support Information

# An improved high-throughput data processing based on combinatorial materials chip approach for rapid construction of Fe-Cr-Ni composition-phase map

Zhaoyang Zhao,<sup>1</sup> Ying Jin,<sup>1,\*</sup> Peng Shi,<sup>1</sup> Yanpeng Xue,<sup>1</sup> Bingbing Zhao,<sup>2</sup> Yanpeng

Zhang,<sup>3</sup> Feifei Huang,<sup>1</sup> Peng Bi,<sup>1</sup> and Qingrui Wang<sup>1</sup>

<sup>1</sup>National Center for Materials Service Safety, University of Science and Technology

Beijing, Beijing 100083, China

<sup>2</sup>Materials Genome Initiative Center, Shanghai Jiao Tong University, Shanghai 200240,

China

<sup>3</sup>China Building Materials Academy, Beijing 100024, China

Vectors were directly converted from the XRD patterns, and then taken into hierarchy clustering analysis based on COS. The clustering results are shown in Figures S1 a-c. Compared to the manual results (Figures 5a-c), only the result of area A (Figure S1 a) achieves a correct rate of 70.11% (61/87), and the results of the other areas (Figures S1 b and c) have obvious deviations and unsatisfying correct rates.

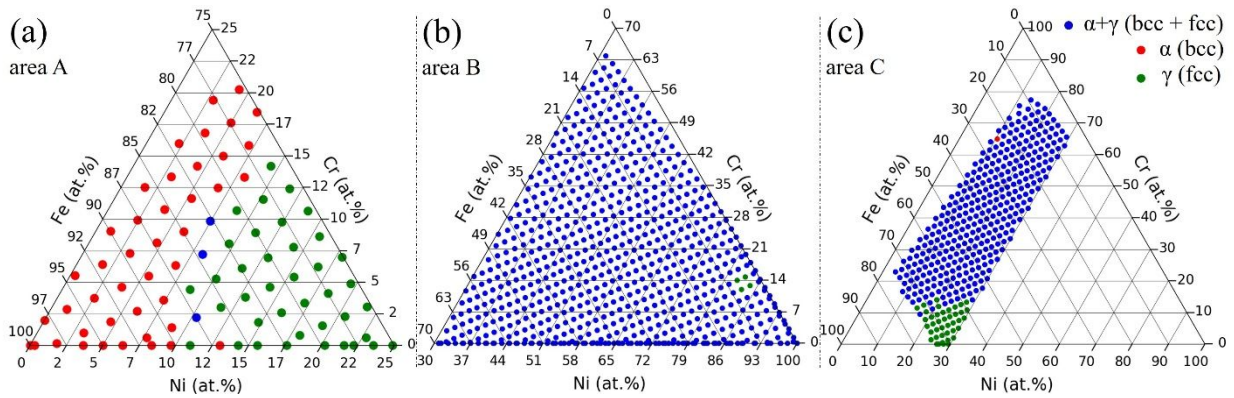

**Figure S1.** (a), (b), and (c) are the automatically constructed results of the areas A, B, and C by HCA based on COS and vectors that directly converted from XRD patterns, respectively.
